# Supplementary material for: Infectious Salmon Anemia Virus Infectivity Is Determined by Multiple Segments with an Important Contribution from Segment 5
Source: Viruses. 2022 Mar 18;14(3):631. doi: 10.3390/v14030631 (PMC8954079; doi:10.3390/v14030631)
Supplement: Supplementary file 1 [file viruses-14-00631-s001.zip › viruses-1598900-supplementary.pdf]

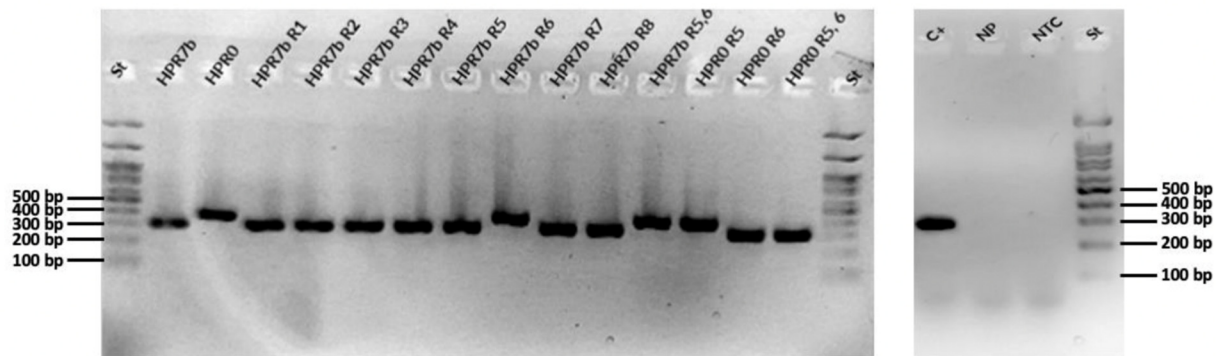

**Figure S1. Detection of ISAV RNA from the supernatant of infected cells by RT-PCR.** Detection of rISAV segment 6 was performed by RT-PCR from the supernatant of passage 3 at 7 dpi of the different reassortant viruses. RNA from supernatants of cell with Control NP and NTC was used in the RT-PCR. Two bands with different lengths were expected, which were HPR regions of HPR7b (312 bp) and HPR0 regions (382 bp). St, standard molecular size.

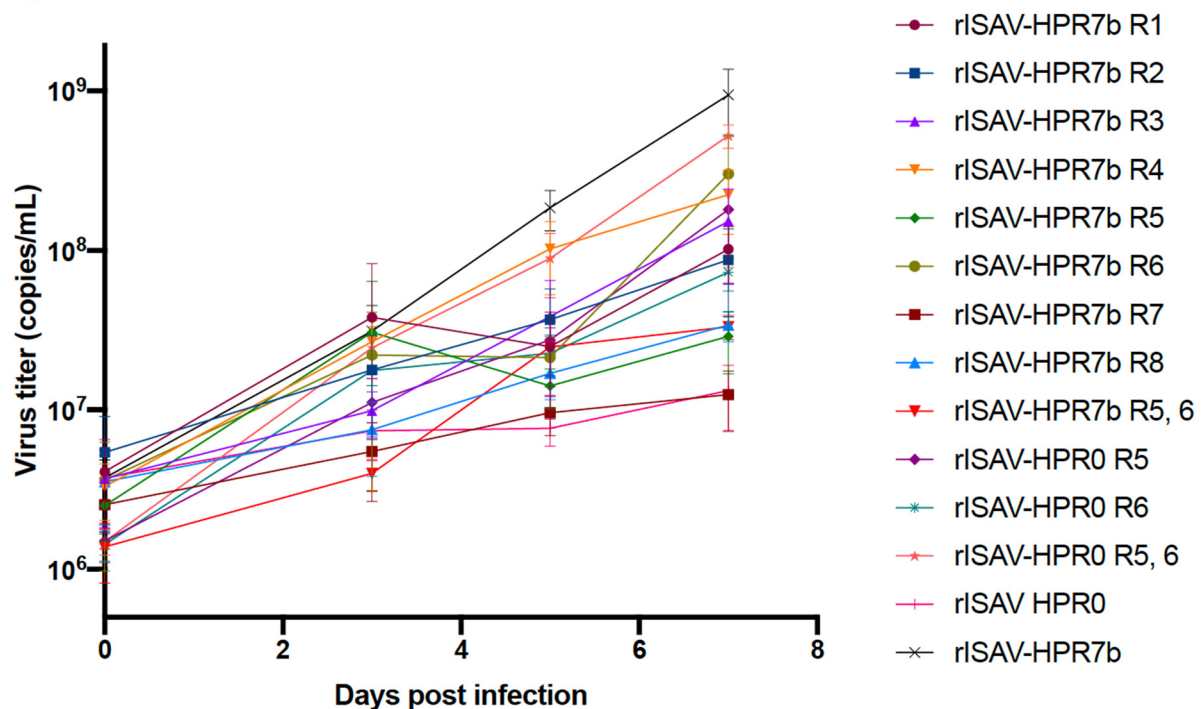

**Figure S2. Kinetics of rISAV replication in infected ASK cells.** ASK cells were infected at an MOI of 0.1 and the segment 8 copy number for each virus from the supernatant was quantified by qRT-PCR at 0, 3, 5, and 7 dpi. Viral titers  $\pm$  SEM from three independent experiments.

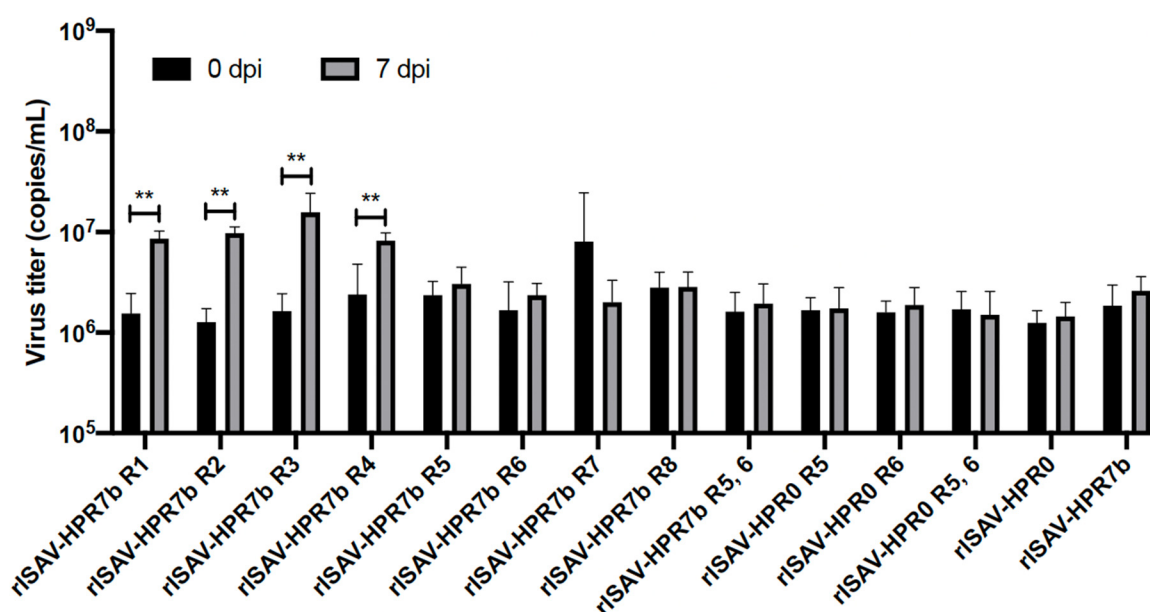

**Figure S3.** Viral titers obtained at 0 and 7 dpi in ASK cells incubated with 0.5 µg/mL of ribavirin as antiviral. ASK cells were infected at an MOI of 0.1 and after the 4-hour incubation period were supplemented with 0.5 µg/mL of ribavirin. The segment 8 copy number for each virus from the supernatant was determined by qRT-PCR at 0 and 7 dpi. Viral titers ± SEM from three independent experiments.  $\alpha=0.05$ ; \*\* $p < 0.005$ .

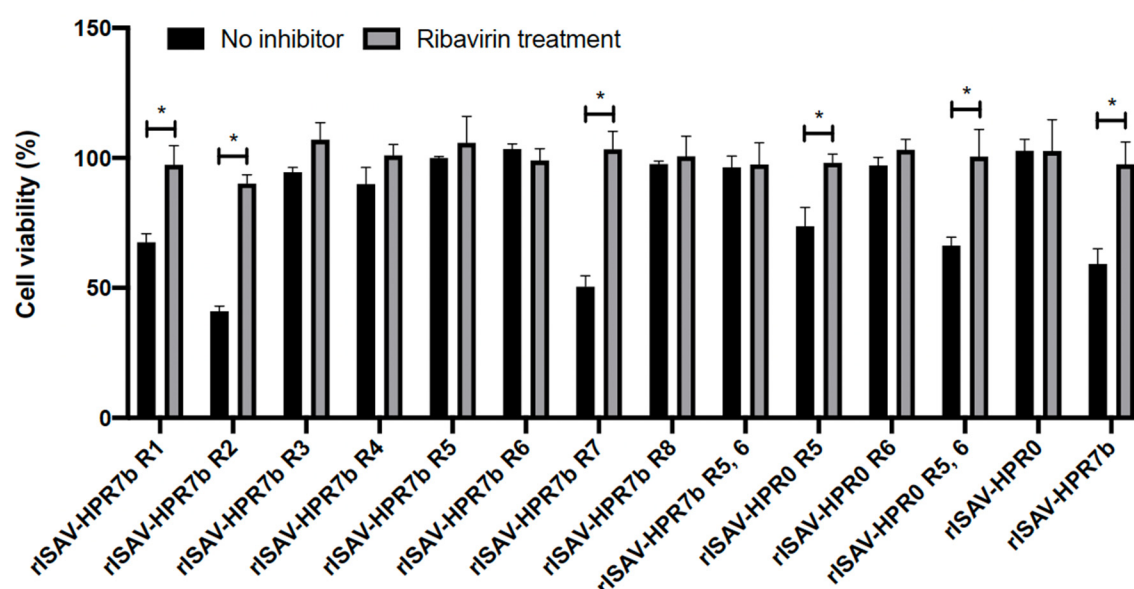

**Figure S4.** Effect of ribavirin treatment on rISAV-induced cell death. Quantification of cellular viability at 7 dpi (left Y-axis) of ASK cells infected at an MOI of 0.1 by MTT assay in the absence (black bars) or presence of 0.5 µg/mL of ribavirin (gray bars). Cellular viability ± SEM from three independent experiments.  $\alpha=0.05$ ; \* $p < 0.05$ .

**Table S1.** Genotyping results of reassortant viruses by sequencing and bioinformatics analysis. The genotype of the rearranged segments (A) of each virus and the insertion region of segment 5 and the HPR region of segment 6 segments (B) are presented for each virus generated in this study.

| Virus    | A                  |                                |
|----------|--------------------|--------------------------------|
|          | Reassorted segment | Genotype of reassorted segment |
| HPR7b R1 | 1                  | HPR0                           |
| HPR7b R2 | 2                  | HPR0                           |

|             |       |       |
|-------------|-------|-------|
| HPR7b R3    | 3     | HPR0  |
| HPR7b R4    | 4     | HPR0  |
| HPR7b R5    | 5     | HPR0  |
| HPR7b R6    | 6     | HPR0  |
| HPR7b R7    | 7     | HPR0  |
| HPR7b R8    | 8     | HPR0  |
| HPR7b R5, 6 | 5 y 6 | HPR0  |
| HPR0 R5     | 5     | HPR7b |
| HPR0 R6     | 6     | HPR7b |
| HPR0 R5, 6  | 5 y 6 | HPR7b |

## B

| Virus       | Segment 5 genotype | Segment 6 genotype |
|-------------|--------------------|--------------------|
| HPR7b       | HPR7b              | HPR7b              |
| HPR0        | HPR0               | HPR0               |
| HPR7b R1    | HPR7b              | HPR7b              |
| HPR7b R2    | HPR7b              | HPR7b              |
| HPR7b R3    | HPR7b              | HPR7b              |
| HPR7b R4    | HPR7b              | HPR7b              |
| HPR7b R5    | HPR0               | HPR7b              |
| HPR7b R6    | HPR7b              | HPR0               |
| HPR7b R7    | HPR7b              | HPR7b              |
| HPR7b R8    | HPR7b              | HPR7b              |
| HPR7b R5, 6 | HPR0               | HPR0               |
| HPR0 R5     | HPR7b              | HPR0               |
| HPR0 R6     | HPR0               | HPR7b              |
| HPR0 R5, 6  | HPR7b              | HPR7b              |
